# Supplementary material for: Risk factors for preeclampsia and eclampsia at a main referral maternity hospital in Freetown, Sierra Leone: a case-control study
Source: PubMed Central journal article supplement (PMC8173903; doi:10.1186/s12884-021-03874-7), 2021-06-02
Supplement: 12884_2021_3874_MOESM1_ESM.pdf [file 12884_2021_3874_MOESM1_ESM.pdf]

Client Name (cut off at dotted line after data entry): \_\_\_\_\_  
.....

**CASE GROUP Study Questionnaire: Risk factors for Pre-Eclampsia/Eclampsia, PCMH**

|                                    |
|------------------------------------|
| Hospital registration Number _____ |
| Date of interview _____            |
| Study ID _____                     |
| Staff name _____                   |

**I. Sociodemographic/economic information**

1. **Client age (years):** \_\_\_\_\_
2. **Religion:** Christian  Muslim  Other : \_\_\_\_\_
3. **Ethnicity:** Mende  Temne  Limba  Fullah  Krio  Other : \_\_\_\_\_
4. **Marital status:** Married  Cohabit  Single  Widowed  Divorced
5. **Completed education:** None  Primary  Secondary  Tertiary
6. **Occupation:** Housewife  Farmer  Trader/Seller  Student  Other : \_\_\_\_\_
7. **Income in SLL per month :** \_\_\_\_\_ SLL
8. **Place of residence:** city  suburb  rural
9. **Travel Time to Hospital(PCMH)(min):** \_\_\_\_\_ **Travel cost to the hospital (SLL) :** \_\_\_\_\_
10. **No. of children living at your home you take care of and age?**
  - a. Own children (number and age) \_\_\_\_\_
  - b. Other children (number and age) \_\_\_\_\_
11. **Is there any pollution in your environment of daily living, e.g. working environment or home?**  
Yes (at least one mark below)  No  Don't know

Close to waste deposit  Close to main road  Cooking with open fire in closed room

Working with chemicals (e.g. pesticides, paint, car components)  Close to oil refinery

Other sources of pollution : \_\_\_\_\_

**12. Is the following present in your household:**

Electricity: Yes  No  Pipe-borne water: Yes  No  Mobile phone: Yes  No

Radio: Yes  No  TV: Yes  No  Fridge: Yes  No

Cattle: Yes  No  Motor-bike, Car: Yes  No  Mosquito- net: Yes  No

**13. Main origin of drinking water:**

Bottled water  Other packaged water  Boiled pipe-borne water  Unboiled pipe-borne water

Boiled well water  Unboiled well water  Boiled bore whole water  Unboiled bore whole water

Other source : \_\_\_\_\_

**II. Recruitment information**

1. **Client was recruited in:** ANC  OPD  Triage  Ward2  Ward3  Ward4  Ward5  Ward6

a. **If recruited in OPD or Triage, please state reason for hospital visit:** \_\_\_\_\_

b. **If recruited in ANC, visit no.:** \_\_\_\_\_

2. **If client is still pregnant:** Gestational week: \_\_\_\_\_

3. **If client has already delivered:** Date of delivery: \_\_\_\_\_

4. **Diagnosis of:** Preeclampsia  Eclampsia

a. **Specify Date of Diagnosis:** \_\_\_\_\_

Client Name (cut off at dotted line after data entry): \_\_\_\_\_  
.....

5. a. Blood pressure at diagnosis: \_\_\_\_\_  
b. Repeat measure after: \_\_\_\_\_ hrs., blood pressure: \_\_\_\_\_
6. Proteinuria grade \_\_\_\_\_
7. Seizure present: Yes  No  Don't know
8. Any Doubts about correctness of Diagnosis, if yes specify:  
\_\_\_\_\_
9. Reported PE/E Symptoms of client: asymptomatic , or any of the following:  
Headache  Epigastric pain  Vomiting  Nausea  Blurred vision  Oedema   
Other symptoms: \_\_\_\_\_
10. PE/E treatment: MgSO4  Hydralazine  Nifedipine(Adalat)  Methyldopa(Aldomet)   
Other treatment for PE/E  : \_\_\_\_\_

### III. Information in the case of client's death

1. In case of reported death of client in study period, state date of death: \_\_\_\_\_  
Specify, a. Cause of death: \_\_\_\_\_  
b. Treatment: \_\_\_\_\_  
c. Complications: \_\_\_\_\_

### IV. Information in the case of delivery

1. Baby is: live birth  fresh stillbirth  macerated stillbirth  neonatal death   
a. If stillbirth or neonatal death reason known? \_\_\_\_\_
2. Sex: Female  Male
3. Gestational week at delivery: \_\_\_\_\_  
a. Preterm birth <37GW
4. Delivery mode: Spontaneous vaginal  Operation vaginal  Planned CS  Emergency CS
5. Apgar score(s): \_\_\_\_\_
6. Birth weight: \_\_\_\_\_g
7. Visible birth defects? Yes  No  Don't know   
If yes, specify: \_\_\_\_\_
8. Neonatal complications? Yes  No  Don't know   
If yes, specify: \_\_\_\_\_

### V. Pregnancy-related health information

1. Current maternal weight: \_\_\_\_\_ kg, as of (date) \_\_\_\_\_
2. Visual evidence of overweight: Yes  No  Don't know
3. MUAC (mid upper arm circumference): \_\_\_\_\_ cm
4. No. of all your pregnancies (including this one): \_\_\_\_\_
5. Time interval to last pregnancy: months between dates of birth (or expected Date of Birth):  
\_\_\_\_\_
6. Have you ever experienced an abortion/miscarriage/stillbirth Yes  No  Don't know   
a. If yes, how many? \_\_\_\_\_  
b. when (which year) \_\_\_\_\_  
c. If known, gestational week: \_\_\_\_\_  
d. If known, state reason: \_\_\_\_\_

Client Name (cut off at dotted line after data entry): \_\_\_\_\_  
.....

7. **Did you ever have an induced abortion?** Yes  No  **If yes, which year(s)?** \_\_\_\_\_
8. **Current pregnancy a twin gestation?** Yes  No  Other (triplets)  \_\_\_\_\_
9. **No. pregnancies with same partner of the current pregnancy:** Don't know   
First pregnancy with this partner  Have one or more pregnancies with that partner already
10. **Did you experience PE/E in a previous pregnancy?** Yes  No  Don't know   
a. **If yes, which year(s)** \_\_\_\_\_  
b. **If yes, specify treatment** \_\_\_\_\_  
c. **If yes, specify outcomes:** \_\_\_\_\_
11. **Known cases of PE/E in any other family member (JUST Family related by blood) ?**  
Yes  No  Don't know   
a. **If yes, specify who:** Mother  Aunt  Sister  Other  \_\_\_\_\_  
b. **If yes, specify when:** \_\_\_\_\_
12. **Did you experience one of the following during THIS pregnancy?**  
Diarrhea (>2 weeks): Yes  No  Don't know   
Urinary tract infection: Yes  No  Don't know   
Anaemia: Yes  No  Don't know   
Gestational diabetes: Yes  No  Don't know   
Placenta praevia: Yes  No  Don't know   
STI/vaginal discharge : Yes  No  Don't know   
b. **Specify any other medical condition or persistent complaint (what, when, treatment):**  
\_\_\_\_\_
- 
13. **Any Malaria episode during this pregnancy?** Yes  No  Don't know   
**If yes, reported Malaria Symptoms of client:** asymptomatic , or any of the following:  
Fever  Chills/Shivering  Headache  Vomiting  Sweats  Diarrhea  Jaundice   
Other symptoms: \_\_\_\_\_  
**If yes, was diagnosis:** symptom-based only  lab-confirmed  Don't know   
**If yes GW/Month of Pregnancy of Malaria episode(s) :** \_\_\_\_\_ GW(s)/Month(s)  
**If yes did you receive IPTp before this Malaria episode(s) occurred:** Yes  No  Don't know   
**If yes was there any Treatment?** Yes  No  Don't know   
**If yes, specify Treatment:** \_\_\_\_\_
14. **Total number of ANC visits during this pregnancy:** \_\_\_\_\_
15. **Regular (at least 2 Doses) intake of IPTp (Fansidar)?** Yes  No  Don't know   
**If yes, specify how many Doses (1 Dose = 3 Pills) of IPTp (Fansidar) did you take?**  
1Dose  2Doses  3Doses  >3 Doses  specify how many : \_\_\_\_\_  
**If yes, specify when did you take IPTp (Fansidar) during pregnancy?**  
GW/Month of 1. Dose: \_\_\_\_\_ GW/Month  
GW/Month of 2. Dose: \_\_\_\_\_ GW/Month  
GW/Month of 3. Dose: \_\_\_\_\_ GW/Month  
GW/Month of 4. Dose: \_\_\_\_\_ GW/Month

Client Name (cut off at dotted line after data entry): \_\_\_\_\_  
.....

16. **Do you sleep under a Mosquito-net?** Yes  No  Don't know   
**If yes, how often did you sleep under a Mosquito-net during this Pregnancy?**  
never  sometimes  often  daily   
**Is the Mosquito-net treated with insecticide?** Yes  No  Don't know
17. **Use of insect repellents indoor?** never  sometimes  often  always   
**a. Specify which kind of repellent:** \_\_\_\_\_
18. **Did you experience ANY fever episode during this pregnancy?** Yes  No  Don't know
19. **Frequent ( $\geq 3$  times a week) heavy physical work during pregnancy:** Yes  No   
**a. If yes:** carry heavy weights  farm work  long distance walking ( $\geq 2$  hours per day)   
prolonged standing ( $\geq 6$  hours per day)  manual laundry  carry heavy weights on head   
other physical work: \_\_\_\_\_
20. **Average sleep duration:**  $\geq 6$  hours per night  3-6 hours per night   $< 3$  hours per night   
**a. Sleeping quality during this pregnancy:**  
daytime sleepiness  snoring  sleep-disordered breathing  frequently waking up at night

**VI. General health and behavior-related information**

1. **History of chronic Hypertension:** Yes  No  Don't know   
**a. If yes** since (year) \_\_\_\_\_  
**b. If yes** last measured blood pressure: \_\_\_\_\_ mmHg
2. **History of Diabetes** Yes  No  Don't know   
**a. If yes** since (year) \_\_\_\_\_  
**b. If yes which Type?** Type I  Type II  Don't know
3. **List all medical diagnoses you have or persistent complaints received during the PAST YEAR and treatments:** \_\_\_\_\_  
\_\_\_\_\_  
**a. Visit of traditional healer?** never  sometimes  often   
**b. Use of any traditional treatments?** never  sometimes  often   
**If yes, please specify Herbs and Diagnosis you received during THIS Pregnancy:**  
\_\_\_\_\_  
\_\_\_\_\_
4. **Family history of chronic Hypertension:** Yes  No  Don't know   
**a. If yes, specify who (JUST Family related by blood):** Mother  Father  Sibling  Other
5. **Family history of Diabetes:** Yes  No  Don't know   
**a. If yes, specify who (JUST family related by blood):** Mother  Father  Sibling  Other
6. **Do you smoke or used to smoke?** Yes  No, never smoked  Used to smoke, but quit   
**a. If yes, how many cigarettes per day /since when/ until when?** \_\_\_\_\_  
\_\_\_\_\_

Client Name (cut off at dotted line after data entry): \_\_\_\_\_  
.....

7. **Do you drink alcohol or used to drink alcohol?** Yes  No, never  Used to drink alcohol   
a. **If yes, how much per week/since when?** \_\_\_\_\_  
b. **If yes, how much during this pregnancy?** \_\_\_\_\_
8. **Describe what you ate the last day at home BEFORE you came to the hospital (ALL MEALS!):** \_\_\_\_\_  
\_\_\_\_\_
9. **Daily diet you eat every day includes calcium sources?**  
Yes, at least one (mark below)  None  Don't know   
Milk/dairy products  Fish with bones  Beans/Peas  Groundnuts   
Dark green leaves  Calcium-supplemented food/juice  Calcium Pills  Other
10. **General fruit intake:** never  monthly  every 2 weeks  weekly  daily
11. **General vegetable intake:** never  monthly  every 2 weeks  weekly  daily
12. **General meat intake:** never  monthly  every 2 weeks  weekly  daily
13. **General animal products intake:** never  monthly  every 2 weeks  weekly  daily   
(e.g. cheese, milk, egg NO meat)
14. **Do you feel you have a lot of emotional stress in general?** Yes  No  Don't know   
a. **If yes, specify reasons:** money problems  personal conflicts  domestic violence   
family conflicts  death  Other reasons : \_\_\_\_\_  
\_\_\_\_\_
- Describe common stressful events:** \_\_\_\_\_
- Frequency of such stressful events:** <3 times a week  ≥3times a week  daily

*Una Tenky* 😊
